# Supplementary material for: Vancomycin-Resistant Enterococci (VRE) in Nigeria: The First Systematic Review and Meta-Analysis
Source: MDPI journal article supplement (doi:10.3390/antibiotics9090565), 2020-09-01
Supplement: s1 [file s1]

|                              | Allocation concealment? |
|------------------------------|-------------------------|
| Abasiubong et al 2019        | +                       |
| Adesida et al 2017           | +                       |
| Anyanwu and Obetta 2015      | +                       |
| Anyanwu et al 2019           | +                       |
| Ayeni et al 2016             | +                       |
| David et al 2017             | +                       |
| Ekuma et al 2016             | +                       |
| Ekenya et al 2017            | +                       |
| Foka et al 2018              | +                       |
| Igbinosa and Beshiru 2019    | +                       |
| Igbinosa and Raje et al 2019 | +                       |
| Ndubuisi et al 2017          | +                       |
| Nsofor et al 2016            | +                       |
| Oedeji et al 2011            | +                       |
| Oguntoyinbo and Okueso 2013  | +                       |
| Olawale et al 2011           | +                       |
| Olawale et al 2014           | +                       |
| Olawale et al 2015           | +                       |
| Shettima and Iregbu 2019     | +                       |

**Figure S1:** Risk of bias summary of VRE studies in Nigeria

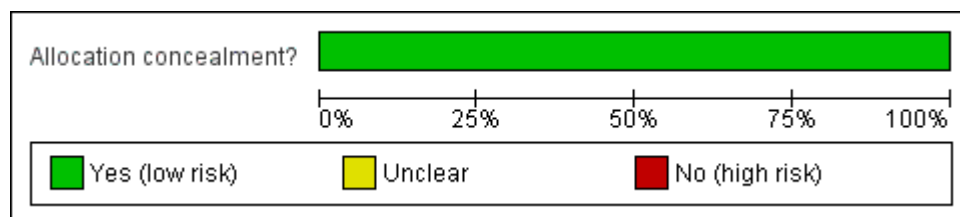

**Figure S2:** Risk of bias graph of VRE studies in Nigeria
